# Supplementary material for: Whole genome sequencing analysis of the cardiometabolic proteome
Source: bioRxiv or medRxiv preprint supplement (doi:10.1101/854752), 2020-04-07
Supplement: Supplementary file [file media-1.pdf]

## Supplementary Material

### Supplementary Figures

Supplementary Figure 1: *cis*-association within the *CTSH* gene. Independent variants as defined by COJO<sup>1</sup> are highlighted by crosses.

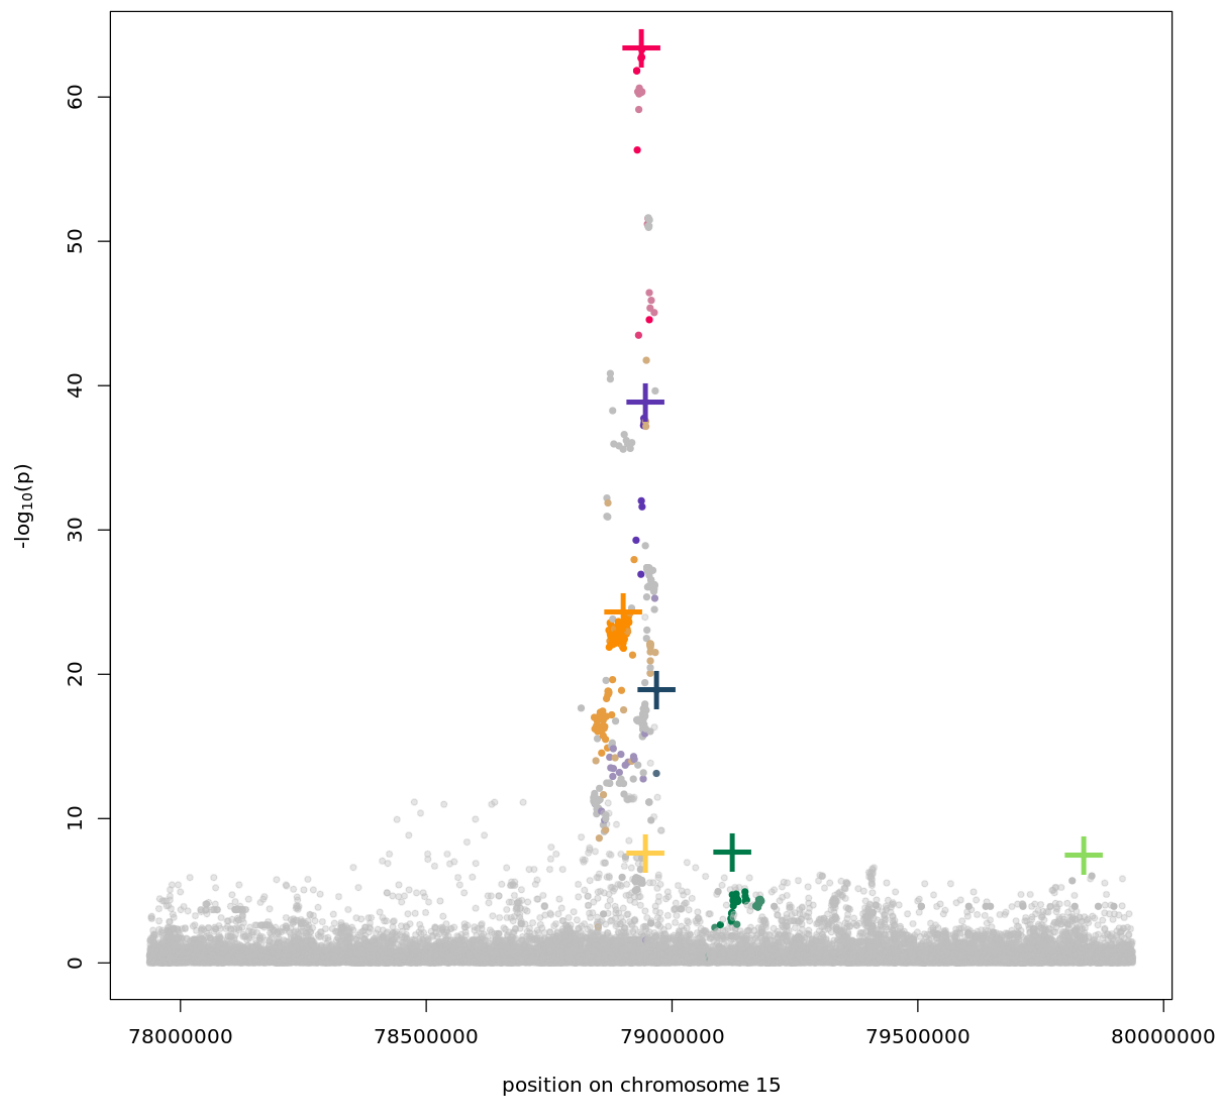

**Supplementary Figure 2: Effect size according to log-MAF for independent variants at pQTLs discovered in this study.** Question marks denote variants not present in the replication dataset and for which no LD-based proxy ( $r^2 > 0.8$ ) could be found, crosses indicate variants that were tested but did not pass the replication significance threshold.

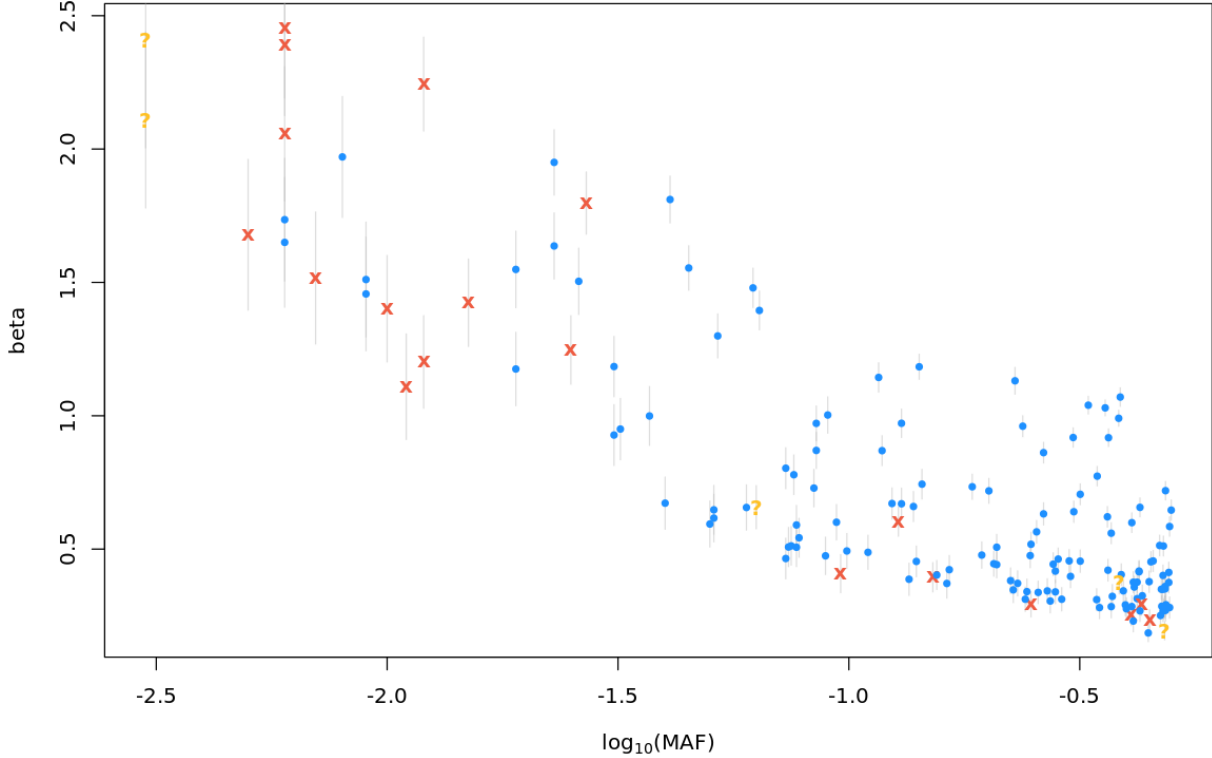

Supplementary Figure 3: Variance explained in proteomic traits compared with 37 non-proteomic traits (Supplementary Table 15) in the same cohort using the same association protocol.

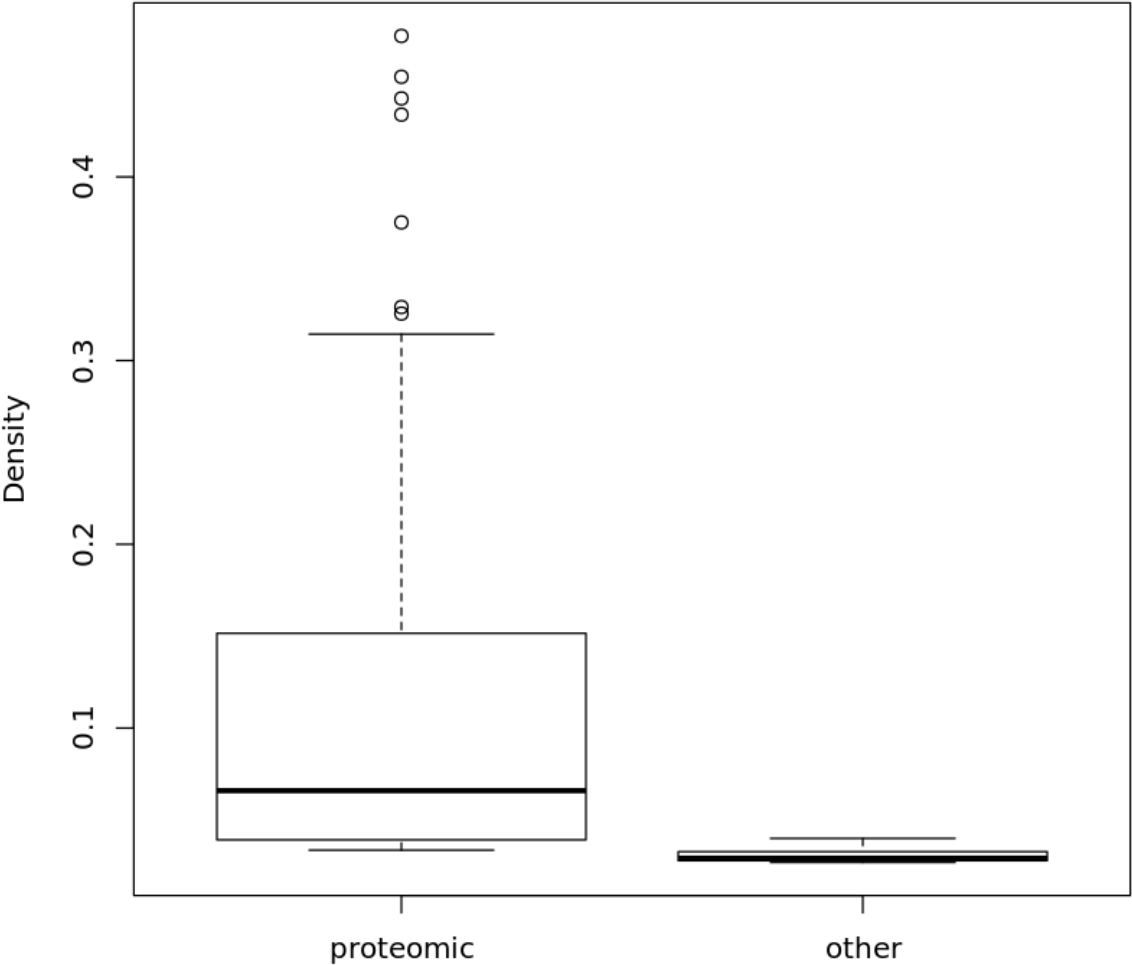

Supplementary Figure 4: Distance to gene boundary as defined by Ensembl REST API for *cis* independent variants.

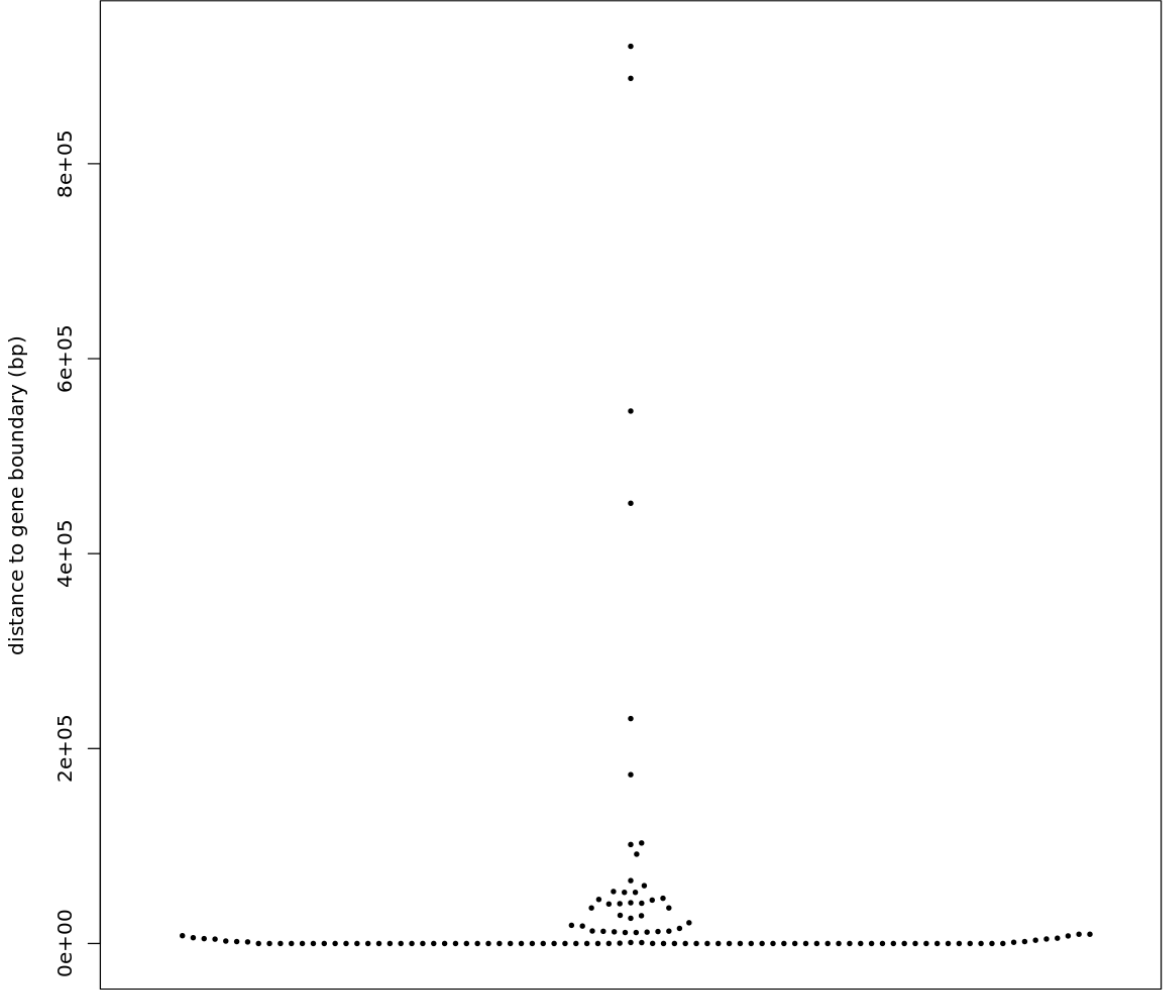

**Supplementary Figure 5: Significant burden associations across all analyses.** Numbers and colour scale represent significance on the  $-\log_{10}$  scale. Columns are variant selection methods (see Methods), rows are the proteins for which these significant *cis*-acting associations were found.

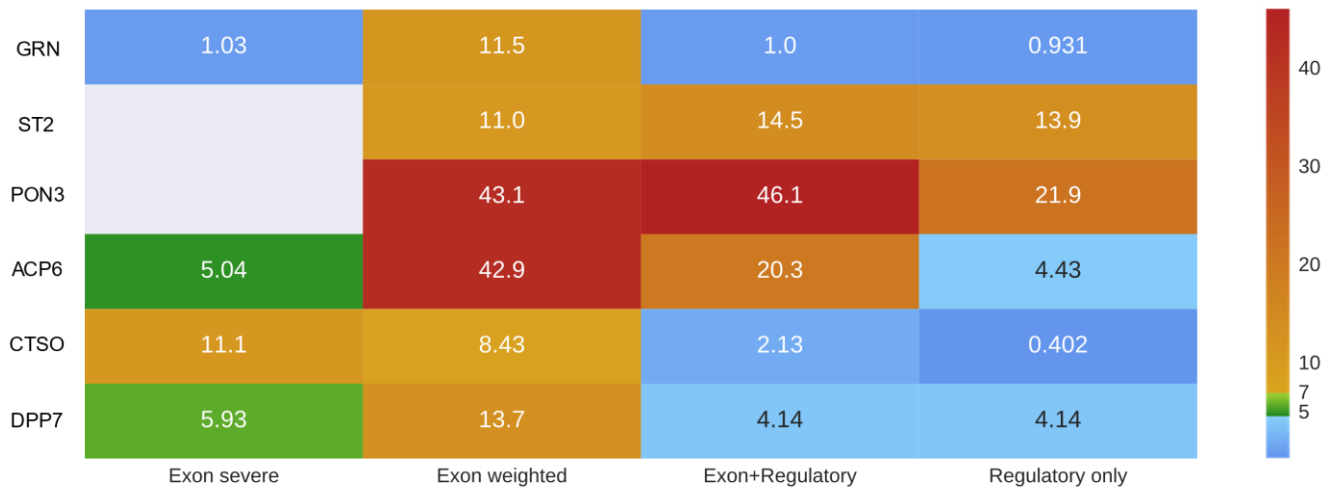

**Supplementary Figure 6: Evaluation of effective number of tests and significance thresholds.** Reporting single-point (a,d), sliding-window rare variant burden test (b, e) and both (c, f), using two different simulation models (a, b, c and d, e, f, respectively), on chromosome 11, across 1,000 simulations.

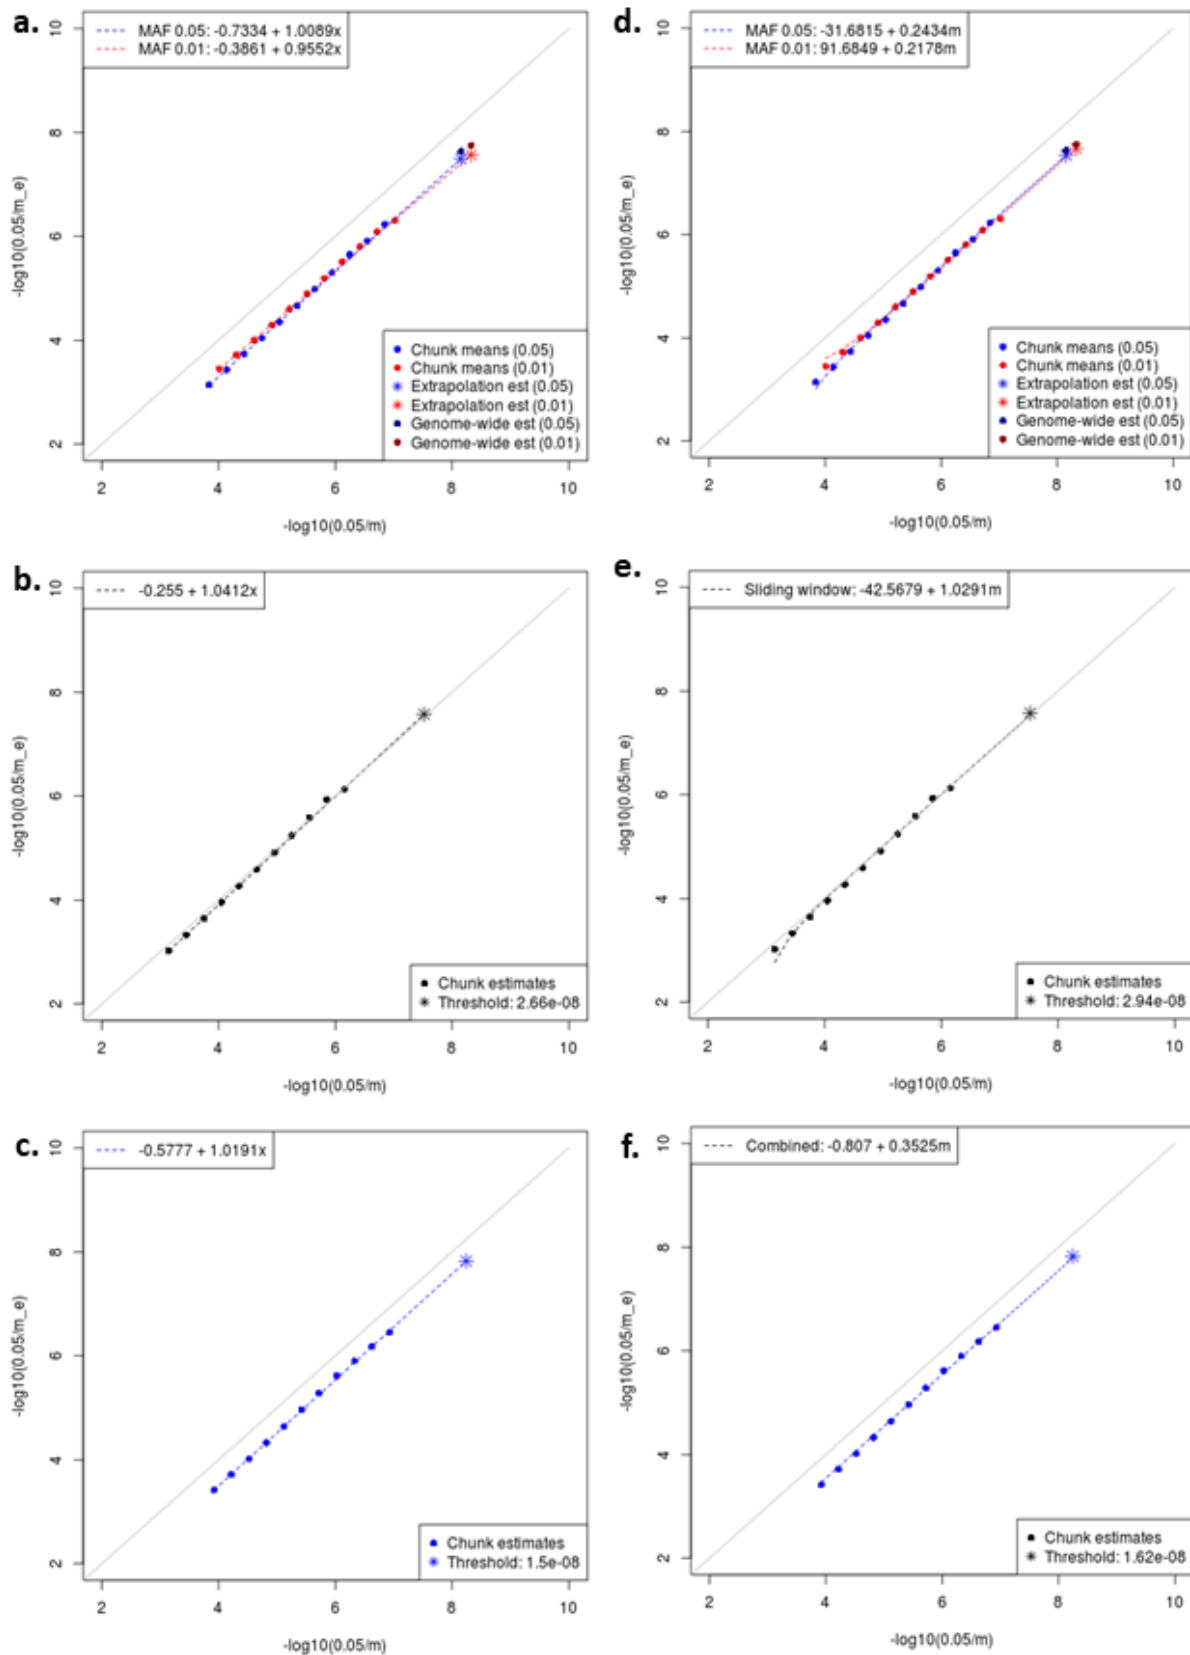

**Supplementary Figure 7. Elastic net model of high cholesterol.** Top left: Precision-recall curves for models with different values of alpha on the holdout set. The ridge model curve (alpha=0) is coloured by lambda value according to the scale on the right of the plot. All other models are drawn on a purple to yellow scale, with yellow corresponding to alpha=0.1 and purple to alpha=1. Top right: Area under the curve for the optimal lambdas + 1 standard error, according to alpha, for predictions on the holdout set. Bottom left: Mean-square error estimate and standard error according to lambda, for alpha=0.1, on the training set. The two vertical lines indicate the minimal lambda and the minimal lambda + 1 standard error, respectively. Bottom left: Coefficient trajectory as a function of log(lambda) for the training set, with the top 4 coefficients in absolute value highlighted. The model coefficients fit on the entire dataset are given in the supplementary Text.

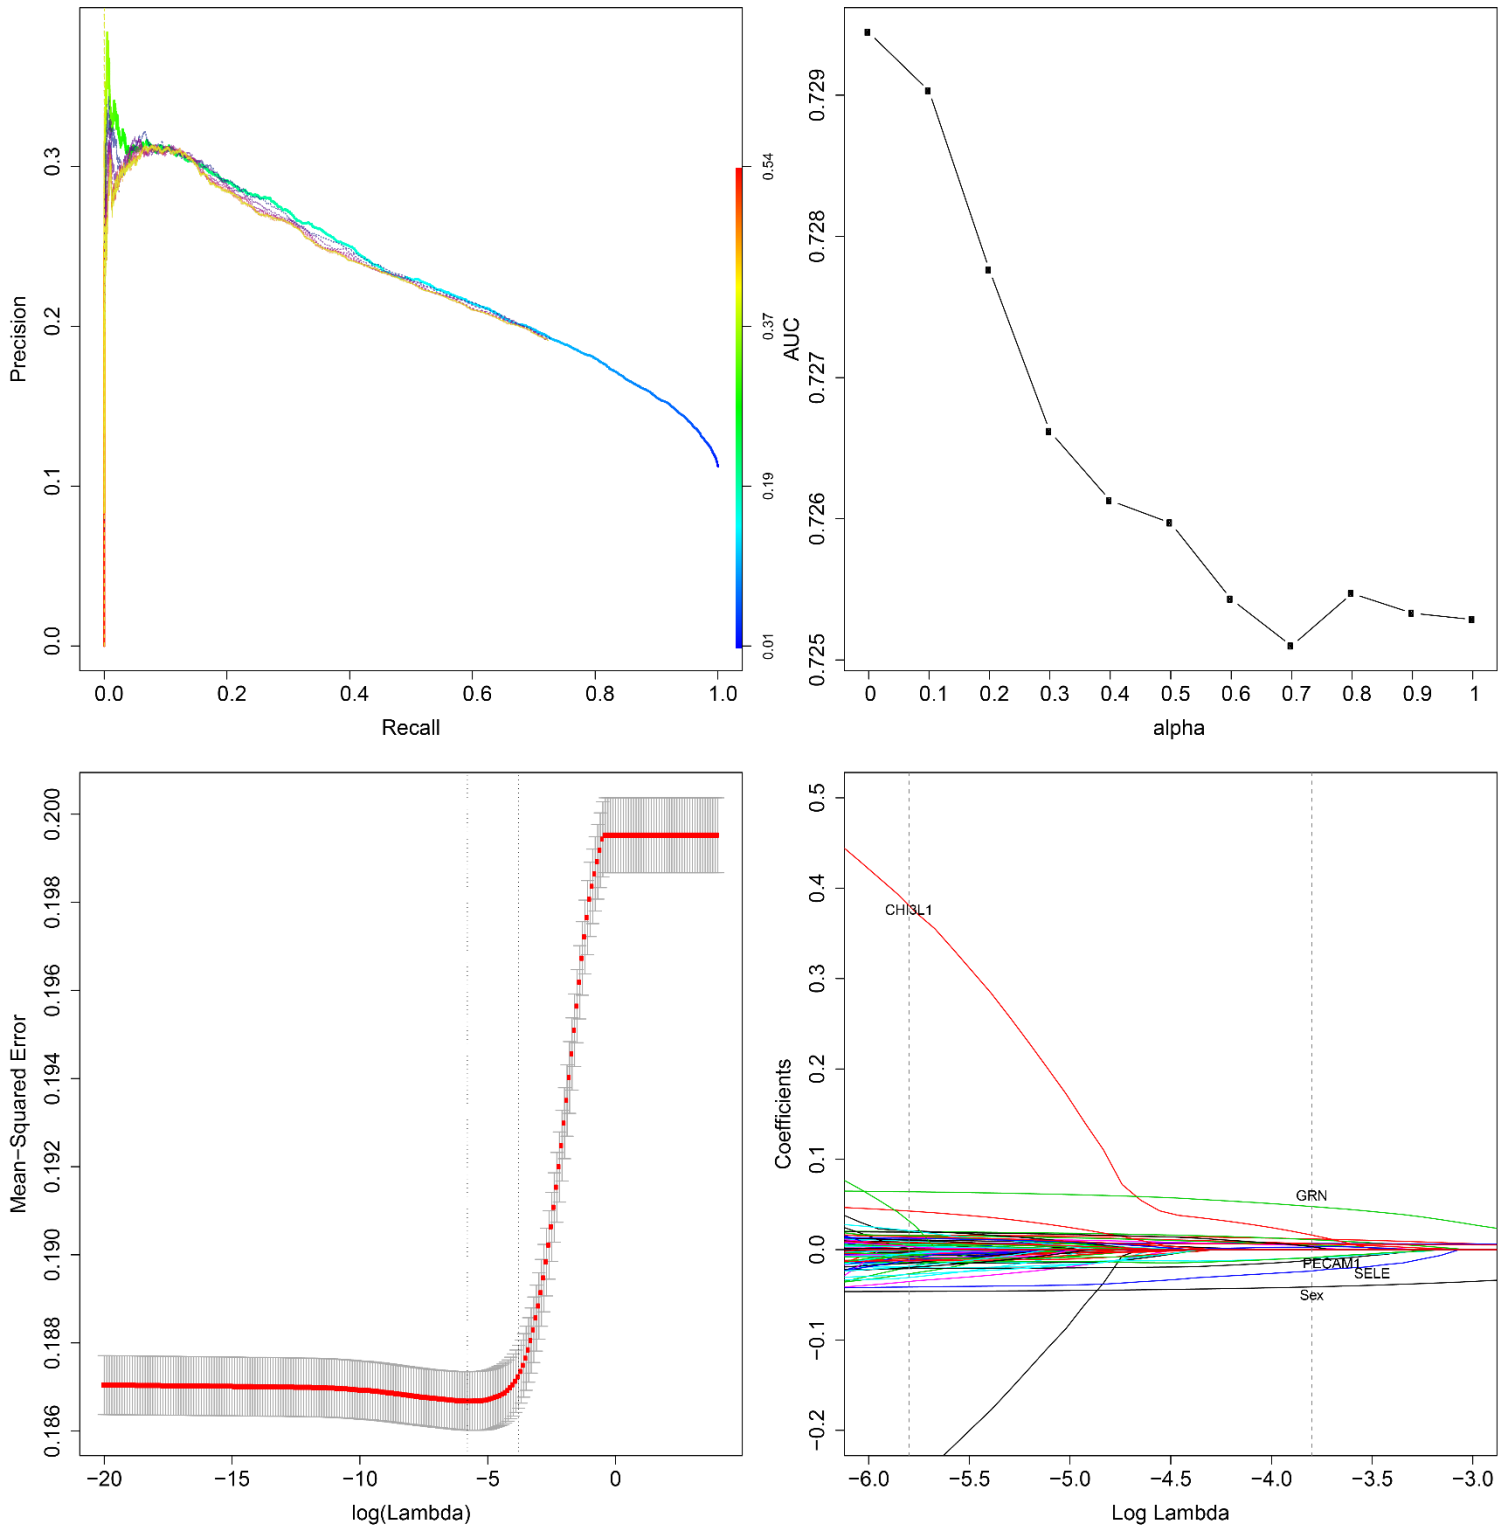

## Supplementary Text

### **Additional notable pQTL signals**

The *PLAUR* missense variant rs4760 is associated with decreased levels of TNFRSF10C (TNF receptor superfamily member 10c) (MAF=13%,  $\beta=-0.96$ ,  $\sigma=0.054$ ,  $P=7.31 \times 10^{-52}$ ). *PLAUR* codes for the urokinase receptor (uPAR). Urokinase is an essential thrombolytic agent and acts as an invasion-promoting protein in several types of cancer<sup>2</sup> through blocking efferocytosis and phagocytosis, notably in apoptotic cardiocytes<sup>3</sup>. This variant has previously been associated with decreased levels of the TRAIL apoptosis-inducing ligand<sup>4</sup>, TNFSF10C. TRAIL has been shown to induce overexpression of urokinase, and uPAR acts as a “don’t eat me” signal for apoptotic cells. This *trans*-pQTL finding could indicate that impairment of the urokinase receptor is linked to an oversensitivity to TRAIL signalling, leading to decreased levels of both TRAIL and its receptor.

rs10886430, an intronic *GRK5* variant, is associated with decreased CCL17 levels (MAF=9.9%,  $\beta=-0.493$ ,  $\sigma=0.0656$ ,  $P=3.72 \times 10^{-13}$ ). CCL17 restrains regulatory T cell homeostasis to promote atherosclerosis through binding to CCR4 and other receptors<sup>5</sup>. Acting through G protein-coupled chemokine receptors, ACKR1 ligands such as CCL17 can induce activation and migration of leucocyte subsets into the vessel wall, and play a pathogenic role during atherosclerosis development<sup>6</sup>. *GRK5* codes for a G protein-coupled receptor kinase, which desensitises activated G protein-coupled receptors through phosphorylation and subsequent binding of arrestin. This *trans*-pQTL finding could indicate a phosphorylation activity of GRK5 on one of the G-coupled receptors of CCL17 such as CCR4 or CCR8. rs10886430 is not a significant eQTL for any gene in any tissue<sup>7</sup>.

rs144846334, an intergenic variant upstream of *SLC10A2*, is associated with decreased levels of EPCAM ( $\beta=-0.779$ ,  $\sigma=0.0738$ , MAF=7.6%,  $P=3.52 \times 10^{-23}$ , *trans*-pQTL). rs144846334 is in strong LD ( $r^2>0.8$ ) with the *SLC10A2* missense variant rs56398830 ( $\beta=-0.77$ ,  $\sigma=0.0730$ ,  $P=5.42 \times 10^{-23}$ ). *SLC10A2* plays a key role in sodium-dependent intestinal bile salt reuptake, and variants in this gene have been associated with numerous phenotypes such as gallbladder diseases, venous thromboembolism, LDL and HDL cholesterol. *SLC10A2* knockout mice have decreased intestinal cholesterol absorption, abnormal bile salt levels and steatorrhea. Loss of *EPCAM* function, is causal for congenital tufting enteropathy<sup>8</sup>, a severe sodium-losing diarrheal disorder presenting in the neonatal period.

rs1309620228, a start lost variant (MAF=0.2%,  $\beta=-2.21$ ,  $\sigma=0.410$ ,  $P=1.21 \times 10^{-7}$ ), and rs556026695, a splice donor variant (MAF=0.2%,  $\beta=-2.36$ ,  $\sigma=0.457$ ,  $P=3.63 \times 10^{-7}$ ) drive a *cis*-RV-pQTL for CTSO ( $P=7.94 \times 10^{-12}$ ). Both variants are present at much lower frequencies in cosmopolitan populations (MAC=1 in TOPMed for rs1309620228; MAC=1 in gnomAD and TOPMed for rs556026695). A third variant, the splice region variant rs763411023, is included but its contribution to the burden is small ( $P=0.066$ ). The *CTSO* gene codes for cathepsin O, a cysteine protease with unclear function. Cathepsin O is ubiquitously expressed, and is involved in normal cellular protein degradation and turnover<sup>9</sup>. In mice, mutations in the *Ctso* gene have been associated with decreased bilirubin and aspartate transaminase levels. rs11722604, an intronic *CTSO* variant, has previously been associated with increased adiponectin in an East Asian cohort. This rare variant burden signal replicates in Pomak ( $P=4.01 \times 10^{-24}$  in the exon weighted analysis), and is entirely driven by the missense variant rs1013059201.

### **Joint model of high cholesterol using CHI3L1 and PECAM1**

To quantify cumulative contributions of predictive proteins to hypercholesterolemia risk, we perform a joint logistic model of high cholesterol using CHI3L1 and PECAM1 scores, including clinical and genetic covariates as predictors. A third protein, GRN, was also significantly associated with



hypercholesterolemic outcomes, however we did not include it in our joint model due to it being driven by a well-known association at the *SORT1* locus. The full model is reported below:

Call:

```
glm(formula = "high_cholesterol~.", family = binomial(link = "logit"),
    data = m)
```

Deviance Residuals:

| Min     | 1Q      | Median  | 3Q      | Max    |
|---------|---------|---------|---------|--------|
| -1.6071 | -0.5381 | -0.3845 | -0.2570 | 3.1113 |

Coefficients:

|                                     | Estimate   | Std. Error | z value  | Pr(> z ) |     |
|-------------------------------------|------------|------------|----------|----------|-----|
| (Intercept)                         | -9.1603766 | 0.0573380  | -159.761 | < 2e-16  | *** |
| Sex2                                | -0.5160839 | 0.0107381  | -48.061  | < 2e-16  | *** |
| Smoking_status1                     | 0.1430716  | 0.0112802  | 12.683   | < 2e-16  | *** |
| Smoking_status2                     | 0.2415334  | 0.0185070  | 13.051   | < 2e-16  | *** |
| Age_when_attended_assessment_centre | 0.0899566  | 0.0007776  | 115.689  | < 2e-16  | *** |
| Qualifications2                     | 0.0985557  | 0.0170953  | 5.765    | 8.16e-09 | *** |
| Qualifications3                     | 0.1647312  | 0.0134691  | 12.230   | < 2e-16  | *** |
| Qualifications4                     | 0.2193386  | 0.0238572  | 9.194    | < 2e-16  | *** |
| Qualifications5                     | 0.1889407  | 0.0186205  | 10.147   | < 2e-16  | *** |
| Qualifications6                     | 0.1748300  | 0.0204647  | 8.543    | < 2e-16  | *** |
| PC1                                 | 0.0011252  | 0.0001022  | 11.014   | < 2e-16  | *** |
| PC2                                 | -0.0034697 | 0.0001912  | -18.151  | < 2e-16  | *** |
| PC3                                 | 0.0056005  | 0.0003398  | 16.482   | < 2e-16  | *** |
| PC4                                 | -0.0021145 | 0.0004537  | -4.661   | 3.15e-06 | *** |
| PC5                                 | 0.0002571  | 0.0007098  | 0.362    | 0.7172   |     |
| PC6                                 | -0.0005228 | 0.0011003  | -0.475   | 0.6347   |     |
| PC7                                 | -0.0001937 | 0.0010362  | -0.187   | 0.8517   |     |
| PC8                                 | -0.0020216 | 0.0011046  | -1.830   | 0.0672   | .   |
| PC9                                 | 0.0006980  | 0.0011411  | 0.612    | 0.5407   |     |
| PC10                                | 0.0062680  | 0.0012046  | 5.203    | 1.96e-07 | *** |
| BMI                                 | 0.0705270  | 0.0010475  | 67.327   | < 2e-16  | *** |
| PECAM1                              | -0.7148646 | 0.0783299  | -9.126   | < 2e-16  | *** |
| CHI3L1                              | 0.7255380  | 0.1181090  | 6.143    | 8.10e-10 | *** |

---

Signif. codes: 0 '\*\*\*' 0.001 '\*\*' 0.01 '\*' 0.05 '.' 0.1 ' ' 1

(Dispersion parameter for binomial family taken to be 1)

Null deviance: 278033 on 395511 degrees of freedom  
 Residual deviance: 252115 on 395489 degrees of freedom  
 (91897 observations deleted due to missingness)  
 AIC: 252161

Number of Fisher Scoring iterations: 5

Both protein scores contribute to the model. The nested model excluding protein scores is given below:

Call:

```
glm(formula = "high_cholesterol~.", family = binomial(link = "logit"),
    data = m[, -c("PECAM1", "CHI3L1"), with = F])
```

Deviance Residuals:

| Min     | 1Q      | Median  | 3Q      | Max    |
|---------|---------|---------|---------|--------|
| -1.6277 | -0.5384 | -0.3851 | -0.2575 | 3.1026 |

Coefficients:

|                                     | Estimate   | Std. Error | z value  | Pr(> z ) |     |
|-------------------------------------|------------|------------|----------|----------|-----|
| (Intercept)                         | -9.1479772 | 0.0570438  | -160.368 | < 2e-16  | *** |
| Sex2                                | -0.5159580 | 0.0107361  | -48.058  | < 2e-16  | *** |
| Smoking_status1                     | 0.1428811  | 0.0112779  | 12.669   | < 2e-16  | *** |
| Smoking_status2                     | 0.2407488  | 0.0185043  | 13.010   | < 2e-16  | *** |
| Age_when_attended_assessment_centre | 0.0899048  | 0.0007774  | 115.654  | < 2e-16  | *** |
| Qualifications2                     | 0.0990247  | 0.0170914  | 5.794    | 6.88e-09 | *** |

|                 |            |           |         |          |     |
|-----------------|------------|-----------|---------|----------|-----|
| Qualifications3 | 0.1648836  | 0.0134662 | 12.244  | < 2e-16  | *** |
| Qualifications4 | 0.2199415  | 0.0238540 | 9.220   | < 2e-16  | *** |
| Qualifications5 | 0.1889738  | 0.0186179 | 10.150  | < 2e-16  | *** |
| Qualifications6 | 0.1753056  | 0.0204601 | 8.568   | < 2e-16  | *** |
| PC1             | 0.0011130  | 0.0001020 | 10.910  | < 2e-16  | *** |
| PC2             | -0.0034758 | 0.0001911 | -18.189 | < 2e-16  | *** |
| PC3             | 0.0055479  | 0.0003397 | 16.333  | < 2e-16  | *** |
| PC4             | -0.0023560 | 0.0004529 | -5.203  | 1.97e-07 | *** |
| PC5             | -0.0001256 | 0.0007084 | -0.177  | 0.8592   |     |
| PC6             | -0.0005892 | 0.0010996 | -0.536  | 0.5921   |     |
| PC7             | -0.0001620 | 0.0010354 | -0.156  | 0.8757   |     |
| PC8             | -0.0020606 | 0.0011037 | -1.867  | 0.0619   | .   |
| PC9             | 0.0004355  | 0.0011402 | 0.382   | 0.7025   |     |
| PC10            | 0.0062708  | 0.0012040 | 5.209   | 1.90e-07 | *** |
| BMI             | 0.0704985  | 0.0010472 | 67.320  | < 2e-16  | *** |

---

Signif. codes: 0 '\*\*\*' 0.001 '\*\*' 0.01 '.' 0.1 ' ' 1

(Dispersion parameter for binomial family taken to be 1)

Null deviance: 278033 on 395511 degrees of freedom  
 Residual deviance: 252235 on 395491 degrees of freedom  
 (91897 observations deleted due to missingness)  
 AIC: 252277

Number of Fisher Scoring iterations: 5

The likelihood ratio test was performed using the lrtest function in the lmer package, and produces

### Coefficients of the elastic net model

The coefficients for the elastic net model described in the text, fit on the entire dataset for more accurate parameter estimation, are given in the table below. The qualifications variables are a dummy coding of the UK Biobank field 6138 using data coding 100305 where variable levels have been turned into labels, and the smoking status variables are a dummy coding of the UK Biobank field 20116 using data coding 90. For protein genetic risk scores, the P-value threshold is included in parentheses.

| Variable group                                          | Variable                                                | Effect                |
|---------------------------------------------------------|---------------------------------------------------------|-----------------------|
|                                                         | (Intercept)                                             | 0.587814192600955     |
|                                                         | Sex                                                     | -0.0413162080627943   |
| Smoking status (dummy variables, vs. never smoked)      | Previous Smoker                                         | 0.0118989443411119    |
|                                                         | Current Smoker                                          | 0.0111962448743365    |
|                                                         | Age                                                     | 0.00684558775742107   |
| Qualifications (dummy variables, vs. University degree) | O levels/GCSEs or equivalent                            | 0.00394959865872145   |
|                                                         | NVQ or HND or HNC or equivalent                         | 0.00895163532749535   |
|                                                         | Other professional qualifications eg: nursing, teaching | 0.00528342948315935   |
| Principal components (PCs)                              | PC1                                                     | 7.47342507105865e-05  |
|                                                         | PC2                                                     | -0.000213788142332847 |
|                                                         | PC3                                                     | 0.00044419244443404   |
|                                                         | PC10                                                    | 3.83494557705365e-05  |
|                                                         | BMI                                                     | 0.00606310791867212   |
| Protein scores                                          | CHI3L1 ( $P < 9.25 \times 10^{-7}$ )                    | 0.0199821126019553    |
|                                                         | GRN ( $P < 7.45 \times 10^{-11}$ )                      | 0.0453636405134527    |
|                                                         | GRN ( $P < 4.57 \times 10^{-9}$ )                       | 0.00589023195891766   |
|                                                         | PECAM1 ( $P < 1.95 \times 10^{-7}$ )                    | -0.01608456535475     |
|                                                         | SELE ( $P < 1.37 \times 10^{-9}$ )                      | -0.00651275802010374  |
|                                                         | SELE ( $P < 8.16 \times 10^{-8}$ )                      | -0.00011048595528366  |
|                                                         | SELE ( $P < 8.87 \times 10^{-8}$ )                      | -0.0174515150666494   |
|                                                         | SELE ( $P < 1.77 \times 10^{-7}$ )                      | -0.00352572640455521  |

### References

1. Yang, J. *et al.* Conditional and joint multiple-SNP analysis of GWAS summary statistics identifies additional variants influencing complex traits. *Nat Genet* **44**, 369-75, S1-3 (2012).
2. Zhou, D.H., Yang, L.N., Roder, C., Kalthoff, H. & Trauzold, A. TRAIL-induced expression of uPA and IL-8 strongly enhanced by overexpression of TRAF2 and Bcl-xL in pancreatic ductal adenocarcinoma cells. *Hepatobiliary Pancreat Dis Int* **12**, 94-8 (2013).
3. Briassouli, P., Komissarova, E.V., Clancy, R.M. & Buyon, J.P. Role of the urokinase plasminogen activator receptor in mediating impaired efferocytosis of anti-SSA/Ro-bound apoptotic cardiocytes: Implications in the pathogenesis of congenital heart block. *Circ Res* **107**, 374-87 (2010).
4. Ahola-Olli, A.V. *et al.* Genome-wide Association Study Identifies 27 Loci Influencing Concentrations of Circulating Cytokines and Growth Factors. *Am J Hum Genet* **100**, 40-50 (2017).
5. Zerneck, A. & Weber, C. Chemokines in atherosclerosis: proceedings resumed. *Arterioscler Thromb Vasc Biol* **34**, 742-50 (2014).
6. Wan, W. *et al.* Atypical chemokine receptor 1 deficiency reduces atherogenesis in ApoE-knockout mice. *Cardiovasc Res* **106**, 478-87 (2015).

7. GTEx Consortium. Human genomics. The Genotype-Tissue Expression (GTEx) pilot analysis: multitissue gene regulation in humans. *Science* **348**, 648-60 (2015).
8. Sivagnanam, M. *et al.* Identification of EpCAM as the gene for congenital tufting enteropathy. *Gastroenterology* **135**, 429-37 (2008).
9. Stoka, V., Turk, V. & Turk, B. Lysosomal cathepsins and their regulation in aging and neurodegeneration. *Ageing Res Rev* **32**, 22-37 (2016).
